# Supplementary material
Source: PubMed Central journal article supplement (PMC7921214)
Supplement: NIHMS1625710-supplement-1.pdf [file NIHMS1625710-supplement-1.pdf]

Supplementary Information for

LILRB4-targeting antibody–drug conjugates for the treatment of acute myeloid leukemia

Yasuaki Anami<sup>a,†</sup>, Mi Deng<sup>b,†</sup>, Xun Gui<sup>a,†</sup>, Aiko Yamaguchi<sup>a</sup>, Chisato M. Yamazaki<sup>a</sup>, Ningyan Zhang<sup>a</sup>, Cheng Cheng Zhang<sup>b,\*</sup>, Zhiqiang An<sup>a,\*</sup>, and Kyoji Tsuchikama<sup>a,\*</sup>

**Author Affiliation**

<sup>a</sup> Texas Therapeutics Institute, The Brown Foundation Institute of Molecular Medicine, The University of Texas Health Science Center at Houston, 1881 East Road, Houston, TX 77054

<sup>b</sup> Departments of Physiology and Developmental Biology, The University of Texas Southwestern Medical Center, 6001 Forest Park Road, Dallas, TX 75390

<sup>†</sup> These authors contributed equally.

**Corresponding Authors**

Cheng Cheng Zhang (Alec.Zhang@UTSouthwestern.edu), Zhiqiang An (Zhiqiang.An@uth.tmc.edu), Kyoji Tsuchikama (Kyoji.Tsuchikama@uth.tmc.edu)

**This PDF file includes:**

Figures S1 to S4  
Tables S1 to S3

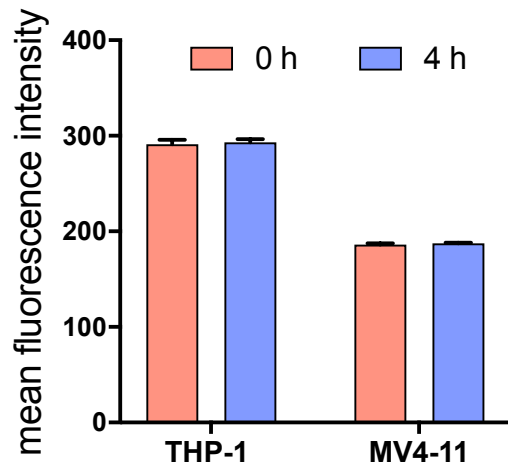

**Fig. S1.** Expression of LILRB4 on the cell surface is consistent over time. Cells were treated with PBS at 4 °C for 4 h and surface LILRB4 was quantified by FACS. All assays were performed in duplicate. Error bars represent mean  $\pm$  SEM.

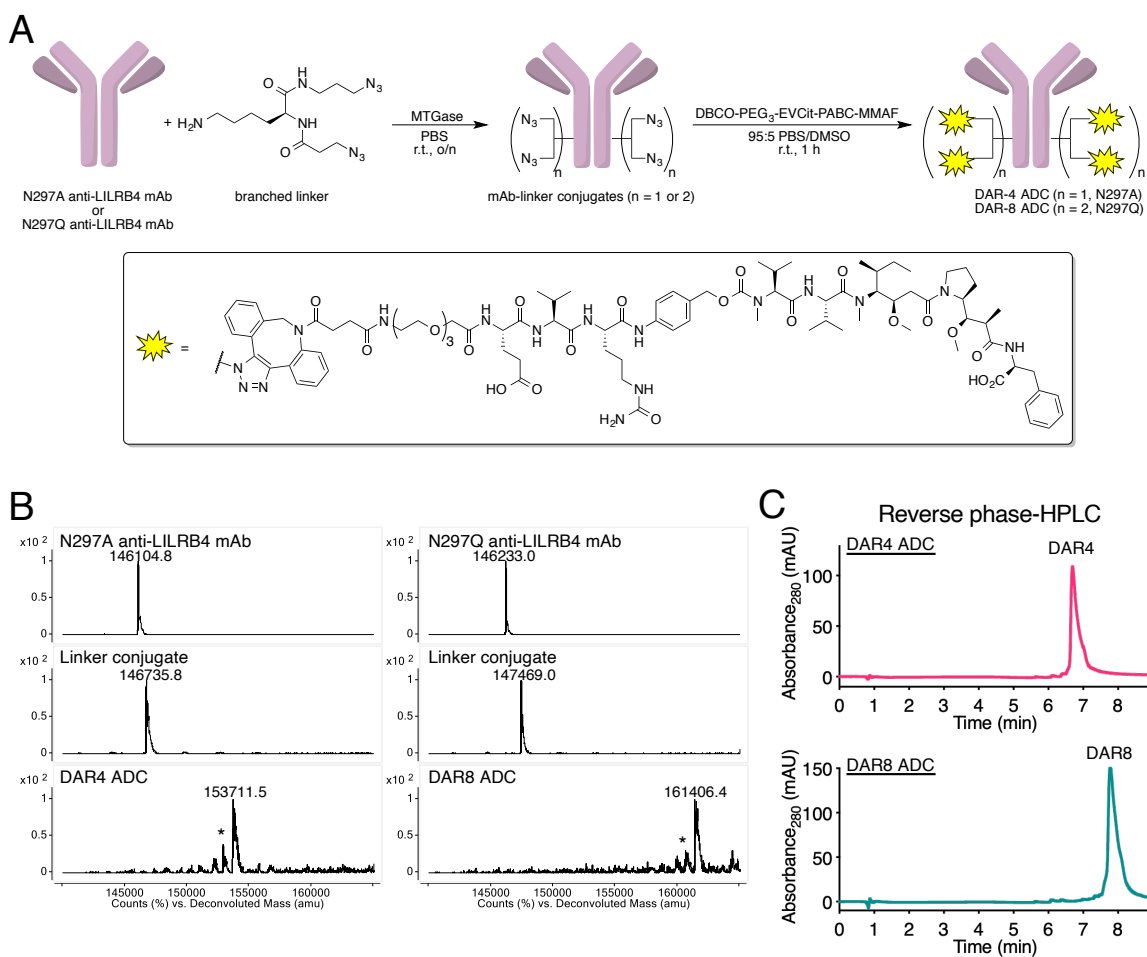

**Fig. S2.** Construction and characterization of homogeneous anti-LILRB4 DAR-4 and DAR-8 ADCs. **(A)** Stepwise construction of DAR-4 and DAR-8 ADCs by installation of diazide branched linkers using MTGase and following strain-promoted azide–alkyne cycloaddition (yellow spark: DBCO–PEG<sub>3</sub>–EVCit–PABC–MMAF module). The chemical structure of the payload module is shown in a box. **(B)** Deconvoluted ESI-mass spectra. Top panel: N297A or N297Q anti-LILRB4 mAb. Second panel: antibody–branched linker conjugate. Third panel: highly homogeneous DAR-4 and DAR-8 ADCs. Asterisk (\*) indicates a fragment ion detected in ESI-MS analysis. **(C)** Reverse-phase HPLC traces (UV: 280 nm) of DAR-4 and DAR-8 ADCs before SEC purification.

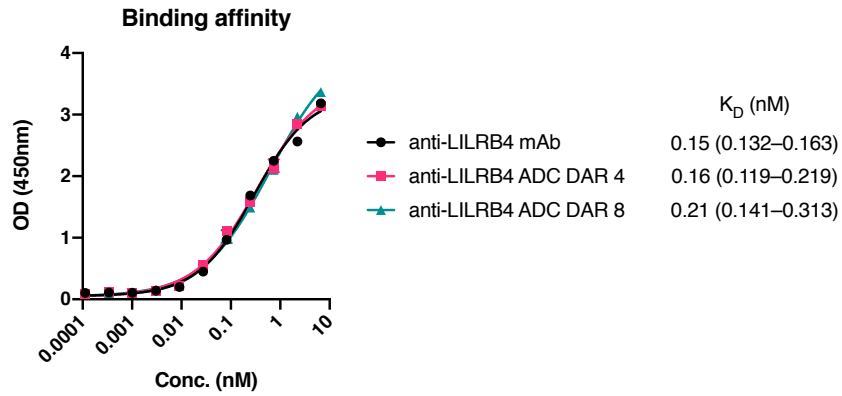

**Fig. S3.** ELISA binding assay using a recombinant human LILRB4. The binding affinities of unmodified anti-LILRB4 mAb (black), DAR-4 ADC (magenta), and DAR-8 ADC (green) were measured. All assays were performed in duplicate. Error bars represent SEM and values in parentheses are 95% confidential intervals.

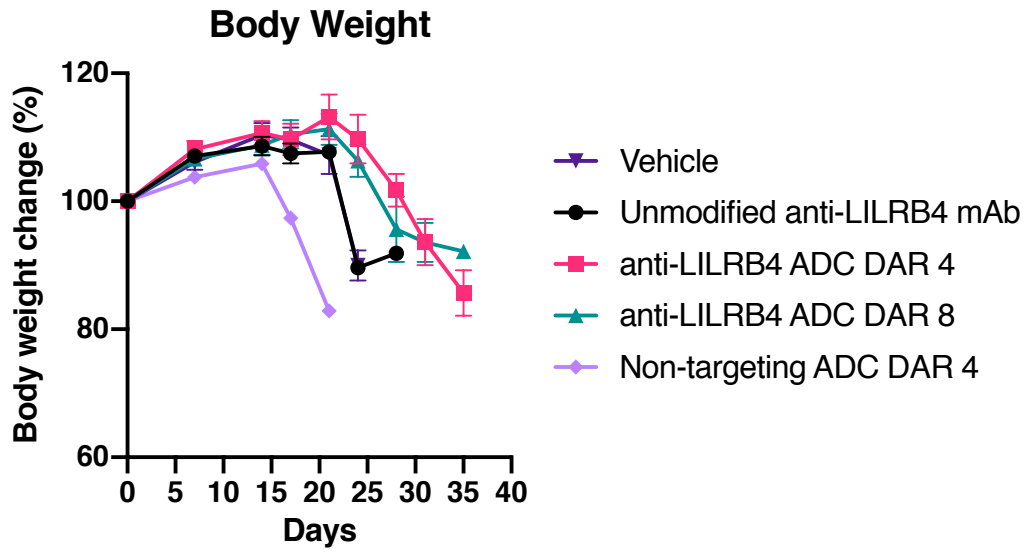

**Fig. S4.** Body weight change during treatment. Female NSG mice (n = 5) were injected intravenously with THP-1 ( $1 \times 10^6$  cells) on Day 0 and treated with each drug (3 mg/kg) or vehicle control (purple) on Day 7, 14, and 21. No significant body weight loss caused by either ADC was observed over the course of study. Error bars represent SEM.

**Table S1.** EC<sub>50</sub> values of ADCs in AML cell lines (n = 3). Calculated based on Fig. 3A. Values in parentheses are 95% confidential intervals.

|                           | EC <sub>50</sub> (nM)       |                            |                          |
|---------------------------|-----------------------------|----------------------------|--------------------------|
|                           | THP-1                       | MV4-11                     | U937                     |
| anti-LILRB4 mAb           | –                           | –                          | –                        |
| anti-LILRB4 ADC DAR4      | 0.025<br>(0.0212 – 0.0283)  | 0.374<br>(0.2432 – 0.6414) | –                        |
| anti-LILRB4 ADC DAR8      | 0.0093<br>(0.0077 – 0.0109) | 0.0197<br>(ND – 0.0239)    | –                        |
| Non-targeting ADC<br>DAR4 | –                           | –                          | –                        |
| MMAF alone                | 31.08<br>(27.21 – 35.81)    | ~168.6                     | 27.01<br>(23.02 – 32.61) |

**Table S2.** AUC of each conjugate (n = 5). Calculated based on Fig. 4A. Values in parentheses are 95% confidential intervals. AUC, area under the curve.

|                       | AUC <sub>total mAb</sub> ( $\mu\text{g day mL}^{-1}$ ) |
|-----------------------|--------------------------------------------------------|
| anti-LILRB4 mAb       | 3136 (2961 – 3312)                                     |
| anti-LILRB4 ADC DAR 4 | 2629 (2515 – 2742)                                     |
| anti-LILRB4 ADC DAR 8 | 645 (604 – 685)                                        |

**Table S3.** Summary of statistical significance.

| Main Figures   | Method                   | Asterisk | Comparison                            | P value           |
|----------------|--------------------------|----------|---------------------------------------|-------------------|
| <b>Fig. 3B</b> | Welch's <i>t</i> test    | *        | hCB: anti-LILRB4 ADC DAR 4            | <i>P</i> = 0.0166 |
|                |                          |          | vs<br>hCB: anti-LILRB4 ADC DAR 4      |                   |
| <b>Fig. 4A</b> | Welch's <i>t</i> test    | ****     | anti-LILRB4 ADC DAR 4 at Day 14       | <i>P</i> < 0.0001 |
|                |                          |          | vs<br>anti-LILRB4 ADC DAR 4 at Day 14 |                   |
| <b>Fig. 4B</b> | Log-rank<br>(Mantel-Cox) | ns       | Vehicle vs anti-LILRB4 mAb            | <i>P</i> = 0.3685 |
|                |                          | ***      | Vehicle vs DAR-4 ADC                  | <i>P</i> = 0.0025 |
|                |                          | **       | Vehicle vs DAR-8 ADC                  | <i>P</i> = 0.0079 |

The *P* values correspond to the asterisks in each figure panel; \**P* < 0.05; \*\**P* < 0.01; \*\*\**P* < 0.005; \*\*\*\**P* < 0.0001.
